# Supplementary material
Source: Research Square preprint supplement (doi:10.21203/rs.3.rs-10295493/v1)
Supplement: Supplementary file 1 [file 26e6804f1355c536a6a5c1f8.docx]

**Appendix A**

**Table A1** *Measurement instruments: constructs, dimensions, item wording and sources*

| **Construct** | **Dimensions** | **Code** | **Item wording** | **Source** |
| --- | --- | --- | --- | --- |
| Community Sustainability Awareness (CSA) | Environmental awareness; social responsibility awareness; ethical expectations | CSA1 | Community members are aware of environmental issues affecting local businesses. | Ajzen, 1991; Freeman, 1984 |
|  |  | CSA2 | The community values businesses that protect the environment. | Freeman, 1984 |
|  |  | CSA3 | Local people understand the importance of social responsibility in business. | Elkington, 1997 |
|  |  | CSA4 | The community expects SMEs to contribute to sustainable local development. | Scott, 1995 |
|  |  | CSA5 | Sustainability is an important concern among community members. | Ajzen, 1991 |
| Community Normative Pressure (CNP) | Social expectation; religious influence; cultural obligation | CNP1 | The community expects our business to behave responsibly. | Ajzen, 1991 |
|  |  | CNP2 | Religious and cultural norms encourage sustainable business practices. | Scott, 1995 |
|  |  | CNP3 | I feel social pressure to operate my business ethically. | Ajzen, 1991 |
|  |  | CNP4 | Community leaders encourage sustainable practices. | Scott, 1995 |
|  |  | CNP5 | Businesses that ignore sustainability lose social approval. | Freeman, 1984 |
| Perceived Community Support (PCS) | Loyalty; cooperation; participation | PCS1 | The community supports businesses that adopt sustainable practices. | Freeman, 1984 |
|  |  | PCS2 | Customers prefer to buy from socially responsible businesses. | Freeman, 1984 |
|  |  | PCS3 | Community members are willing to cooperate in sustainability initiatives. | Putnam, 1993 |
|  |  | PCS4 | Our business receives positive feedback when acting responsibly. | Putnam, 1993 |
|  |  | PCS5 | The community promotes sustainable businesses through word-of-mouth. | Putnam, 1993 |
| Owner Sustainability Attitude (OSA) | Positive evaluation of sustainability benefits | OSA1 | Implementing sustainability practices is beneficial for my business. | Ajzen, 1991 |
|  |  | OSA2 | Sustainability improves the long-term success of my firm. | Ajzen, 1991 |
|  |  | OSA3 | Adopting sustainability enhances our business reputation. | Freeman, 1984 |
|  |  | OSA4 | Sustainability practices align with my personal values. | Ajzen, 1991 |
|  |  | OSA5 | Sustainability contributes positively to society. | Elkington, 1997 |
| Perceived Behavioural Control (PBC) | Financial capacity; knowledge; skill; institutional support | PBC1 | I have sufficient knowledge to implement sustainability practices. | Ajzen, 1991 |
|  |  | PBC2 | My business has adequate resources to adopt sustainability initiatives. | Ajzen, 1991 |
|  |  | PBC3 | Government or institutional support makes sustainability easier. | Scott, 1995 |
|  |  | PBC4 | I feel confident in managing sustainability-related changes. | Ajzen, 1991 |
|  |  | PBC5 | Financial constraints limit sustainability implementation. | Ajzen, 1991 |
| Social Capital (SOC) | Trust; network strength; reciprocity | SOC1 | There is strong trust among community members. | Putnam, 1993 |
|  |  | SOC2 | Business relationships are based on mutual respect. | Putnam, 1993 |
|  |  | SOC3 | Community networks help share business information. | Putnam, 1993 |
|  |  | SOC4 | Reciprocity is common in business interactions. | Putnam, 1993 |
|  |  | SOC5 | Social connections influence business decisions. | Putnam, 1993 |
| Sustainability Practices Adoption (SPA) | Environmental practices; social initiatives; ethical governance | SPA1 | Our business actively reduces waste and pollution. | Elkington, 1997 |
|  |  | SPA2 | We engage in activities that benefit the local community. | Freeman, 1984 |
|  |  | SPA3 | We ensure fair treatment of employees. | Elkington, 1997 |
|  |  | SPA4 | Ethical standards guide our business decisions. | Freeman, 1984 |
|  |  | SPA5 | We invest in long-term sustainable business strategies. | Elkington, 1997 |

Note. CSA = Community Sustainability Awareness; CNP = Community Normative Pressure; PCS = Perceived Community Support; OSA = Owner Sustainability Attitude; PBC = Perceived Behavioural Control; SOC = Social Capital; SPA = Sustainability Practices Adoption. PBC5 is a negatively worded item and should be treated consistently with the coding procedure used in the analysis.
